# Supplementary material for: Investigating large methane enhancements in the U.S. San Juan Basin
Source: Oxford University Press journal article supplement (doi:10.1525/elementa.038), 2020-01-01
Supplement: si_4corners_petron_accepted.docx [file si_4corners_petron_accepted.docx]

**Supplementary Material**

**Investigating Large Methane Enhancements in the United States San Juan Basin**

Gabrielle Pétron1,2*, Benjamin Miller1,2, Bruce Vaughn3, Eryka Thorley1,2, Jonathan Kofler1,2, Ingrid Mielke-Maday1,2, Owen Sherwood3,4, Edward Dlugokencky2, Bradley Hall2, Stefan Schwietzke1,2,5, Steven Conley6, Jeff Peischl1,2, Patricia Lang2, Eric Moglia1,2, Molly Crotwell1,2, Andrew Crotwell1,2, Colm Sweeney2, Tim Newberger1,2, Sonja Wolter1,2, Duane Kitzis1,2, Laura Bianco1,2, Clark King2, Tim Coleman1,2, Allen White2, Michael Rhodes1,2, Pieter Tans2 and Russell Schnell2

1. Cooperative Institute for Research in Environmental Sciences, University of Colorado, 216 UCB, Boulder, Colorado 80309, United States

2. NOAA Earth System Research Laboratory, 325 Broadway, Boulder, Colorado 80305, United States

3. Institute for Arctic and Alpine Research, University of Colorado, 450 UCB, Boulder, Colorado 80309, United States

4. Department of Earth Sciences, Dalhousie University, 1355 Oxford Street, Halifax, Nova Scotia B3H 4R2, Canada

5. Now at Environmental Defense Fund, First Floor Bank Chambers, 6 Borough High Street, London SE1 900, United Kingdom

6. Scientific Aviation Inc., 3335 Airport Road Suite B, Boulder, Colorado 80301, United States

*Corresponding author: Gabrielle Pétron, gabrielle.petron@noaa.gov

**List of contents:**

**Table S1.** Natural gas, coal bed methane and oil well count and production statistics for the San Juan Basin and the USA, based on [Grant et al., 2016] and EIA [2018b].

**Table S2.** USA and SJB underground and surface coalmine 2015 production statistics and EPA CH4 emission estimates

**Table S3.** Facility counts from various public sources for the northern and southern San Juan Basin.

**Table S4.** Hourly average CH4 emission estimates or ranges for various O&G upstream and midstream source categories based on 2015 annual CH4 emission estimates reported by operators to the EPA Greenhouse Gas Reporting Program (EPA GHGRP, 2018).

**Table S5.** Cattle head count and estimated emissions from enteric fermentation for La Plata (CO), Rio Arriba and San Juan (NM) counties.

**Table S6.** Results from combustion emission plume sampling downwind of O&G facilities with NOAA GMD Mobile Laboratory CRDS in-situ CO2, CH4 and CO measurements during the April 2015 campaign.

**Table S7.** CH4 and C2H6 plume interval analysis results forflight data within the same hour

**Figure S1.** Annual natural gas (A) and oil (B) production volumes for Colorado, New Mexico and the northern and southern San Juan Basin portions between 2000 and 2015.

**Figure S2.** Monthly mean hourly surface horizontal wind speed at seven monitoring stations in the San Juan Basin. 2015 data retrieved from EPA AQS. Site information is in Table 2 of main manuscript.

**Figure S3.** April 2015 distribution of mean hourly surface horizontal wind “originating” direction at seven monitoring stations in the San Juan Basin. Low to high frequencies of occurence are shown in light to dark gray colors. Colored boxes (blue for nighttime and orange for daytime) highlight strong diurnal features in surface wind direction for six sites.

**Figure S4.** NOAA wind profiler hourly retrieval of boundary layer height over the NLS (A) and FMT (B) for the period April 9 to May 1, 2015. Colored lines correspond to four days in April 2015 with aircraft data used in this paper’s basin analysis (Section 4.3).

**Figure S5.** Locations of discrete air samples collected mostly in CH4 plumes emanating from the Fruitland coal outcrop in La Plata County, CO, on three days in April 2015.

**Figure S6.** Time series of in-situ CH4 (red trace) and CO2 (green trace) CRDS measurements on April 11, 2015. CH4 results for discrete air samples collected that day are shown in red circles.

**Figure S7.** Time series of in-situ CH4 (red trace) and CO2 (green trace) CRDS measurements on April 12, 2015. CH4 results for discrete air samples collected that day are shown in red circles.

**Figure S8.** C2H6-to-CH4 (A) and C3H8-to-C2H6 (B) correlation plots for air samples collected on April 11, 12 and 14, 2015 in La Plata County, CO.

**Figure S9.** Time series of in-situ CH4 (red trace) and CO2 (green trace) CRDS measurements on April 19, 2015. CH4 results for discrete air samples collected that day are shown in red circles.

**Figure S10.** C2H6-to-CH4 correlation plots for air samples collected on April 19, 2015. Samples collected downwind of the San Juan underground coal mine are shown in red circles.

**Figure S11.** Time series of in-situ CH4 (red trace) and CO2 (green trace) CRDS measurements on April 21, 2015. CH4 results for discrete air samples collected that day are shown in red circles.

**Figure S12.** C2H6-to-CH4 correlation plots for air samples collected on April 21, 2015. Samples collected while driving on the Navajo surface coal mine with a Navajo EPA escort are at background levels for CH4 and C2H6 and are shown in red enlarged circles to improve visibility. Information for other samples collected on that day is in the plot caption.

**Figure S13.** Example of surface CH4 build-up overnight in the San Juan Basin as shown by repeated N-S transects between Durango, CO and Aztec, NM on a low wind night in April 2015.

**Figure S14.** A) Surface elevation color-coded by measured CH4 dry air mole fraction for an early morning loop drive with the NOAA instrumented van in the SJB on April 20, 2015 (see also map in Figure S15A). Some low-lying areas with active O&G operations or outcrop degassing show strongly enhanced CH4 (note some measurements are > 5ppm).

B) Time series of surface CH4 color-coded with latitude (North to South shown as purple to red colors, see scale in Figure S15A). The times when discrete air samples were collected are shown with the black open symbols on both plots (results are shown in Figure S15B-F).

**Figure S15.** A) Map showing the April 20, 2015 early morning drive track with the NOAA ML (thick black line) and flask sampling locations (colored symbols). B) Correlation plots for CH4 and several NMHC analyzed in the flasks color-coded by latitude.

**Figure S16.** SA Mooney flight track color-coded by CH4 (left column) and C2H6 (middle column) mixing ratios for 5 survey flight days. Right column has correlation plots for the in-situ CH4 and C2H6 from each flight with symbols color-coded by latitude.

**Figure S17.** Same as Figure S16, for the NOAA P3 flights.

**Figure S18.** SA Mooney in-situ CH4 (A) and C2H6 (B) (1-minute average and standard deviation) versus NOAA GMD analysis results for discrete air samples collected on April 13 and April 29, 2015.

**Figure S19.** Aircraft latitude and in-situ CH4 (black) and C2H6 (green) time series (A) and plume interval C2H6-to-CH4 correlation analysis results (B) for the April 19, 2015 SA Mooney SJB survey flight.

**Figure S20.** Compilation of SA Mooney 5 survey flight CH4 enhancement intervals with correlated C2H6 (R2>0.5, circles colored by correlation slope) and enhancement intervals with R2 < 0.5 (open circles). Circles are sized by the interval integrated CH4 enhancement (iCH4). Black lines show county and state boundaries. The Fruitland coal formation surface outcrop is shown in light purple color.

**Figure S21.** Same as Figure S20 with circles sized by the interval integrated C2H6 enhancement (iC2H6).

**Figure S22.** Latitudinal distribution of 5 SA Mooney flights detected CH4 integrated enhancements (total shown in red; with correlation with C2H6 (R2> 0.5) shown in black). Also shown are boundary layer in situ CH4 from two NOAA Twin Otter mass balance flight downwind N-S transects on the eastern border of the San Juan Basin [Smith et al., 2017].

**Figure S23.** Illustration of how air circulation’s typical diurnal pattern and local emissions impact air composition at the surface in the San Juan Basin.

**Supplementary Text**

Table S1: Natural gas, coal bed methane and oil well count and production statistics for the San Juan Basin and the USA, based on [Grant et al., 2016] and EIA [2018b].

| Area | | Active Well Count | | | Inactive wells | Production – April 2015 | | |
| --- | --- | --- | --- | --- | --- | --- | --- | --- |
| Gas | CBM | Oil | Gas  109 scf | CBM  109 scf | Oil  103bbl |
| San Juan Basin | Colorado | 861 | 2,247 | 86 | na | 5.18 | 22.74 | 3 |
| New Mexico | 15,186 | 4,851 | 1,639 | 15,414 | 35.63 | 21.58 | 713 |
| Total | 16,047 | 7,098 | 1,725 |  | 40.81 | 44.32 | 716 |
| USA Total | | 574,530 | | 586,896 |  | 2,094,707 | 99,765 | 288,788 |

Table S2: USA and SJB underground and surface coalmine 2015 production statistics and EPA CH4 emission estimates

| Area | Underground coal mines | | | Surface coal mines | | |
| --- | --- | --- | --- | --- | --- | --- |
| Number1 | Production1  million tonnes or Tg | CH4 emissions2 kt/yr or Gg/yr | number | Production1  million tonnes or Tg | CH4 emissions2 kt/yr or Gg/yr |
| SJB NM | 1 | 5.9 | 27-43 | 1 | 5.2 | na |
| USA | 305 | 278 | 2014 | 529 | 534 | 422 |

1 Source: Table 2 in US EIA Annual Coal Reports (https://www.eia.gov/coal/annual/)

2 Sources:2010-2015 EPA GHGRP for SJB coalmines and EPA 2017 GHGI for all US mines in 2015

| Facility Type | SJB Colorado (La Plata) | | | | | SJB New Mexico (Rio Arriba and San Juan Counties) | | |
| --- | --- | --- | --- | --- | --- | --- | --- | --- |
| EPA/SUIT | CDPHE | COGCC | M2015 | EPA GHGRP | EPA/NMED | M2015 | EPA GHGRP |
| Gathering Compressor Station / Central Delivery Point | 42 | 5 | 13 | 1* | 8 | 38 | 99 | 20 |
| Treating/Processing Plant | 17 | 10 | 10 |  | 4 | 8 |  | 7 |
| Transmission Compressor Station | 3 |  |  |  |  | 1 |  |  |
| Coal Mine |  |  |  |  |  | 1 |  | 1 |
| Landfill |  |  |  |  |  | 1 |  | 1 |
| Power Plant/ Energy Utility |  |  |  |  |  | 5 |  | 4 |

Table S3: Facility counts from various public sources for the northern and southern San Juan Basin.

Table S4: Hourly average CH4 emission estimates or ranges for various O&G upstream and midstream source categories based on 2015 annual CH4 emission estimates reported by operators to the EPA Greenhouse Gas Reporting Program (EPA GHGRP, 2018).

| Source Category  3 SJB counties | Emission estimates based on GHGRP |
| --- | --- |
| GHGRP total point sources emissions | 287 kg CH4/hr (NSJB, 11 facilities)  539 kg CH4/hr (SSJB, 28 facilities) |
| GHGRP compressor emission ranges | < 1kg/hr to 156 kg/hr |
| GHGRP processing plant emission ranges | < 1kg/hr to 129 kg/hr |
| GHGRP area source emissions for upstream operations (16 operators) | 21.4 tonnes CH4/hr |
| Pneumatic devices alone | 11.3 tonnes CH4/hr |
| GHGRP range for company average emissions per well | 0.26 kg CH4/well/hr to 12.33 kg CH4/well/hr |
| GHGRP average emissions per well | 8.93 kg CH4/well/hr |

Table S5: Cattle head count and estimated emissions from enteric fermentation for La Plata (CO), Rio Arriba and San Juan (NM) counties.

| Cattle | EF 1 (g/head/hr) | Head count2 | | | Estimated emissions  kg/hr |
| --- | --- | --- | --- | --- | --- |
| La Plata | Rio Arriba | San Juan |
| Beef cows | 7.8 | 13,300 | 18,717 | 13,895 | 358 |
| Milk Cows | 18.3 | 46 | 176 | 53 | 5 |
| Other | 4.6 | 7,361 | 7,271 | 6,785 | 99 |
| TOTAL |  | 20,707 | 26,164 | 20,733 | 462 |

1. Johnson and Johnson[[**1995**](http://onlinelibrary.wiley.com/doi/10.1002/2013JD021272/full#jgrd51415-bib-0028), Table [2](http://onlinelibrary.wiley.com/doi/10.1002/2013JD021272/full#jgrd51415-tbl-0002)]

2. https://agcensus.usda.gov/Publications/2012/Full_Report/Volume_1,_Chapter_1_US/

Table S6: Results from combustion emission plume sampling downwind of O&G facilities with NOAA GMD Mobile Laboratory CRDS in-situ CO2, CH4 and CO measurements during the April 2015 campaign.

1 Emission Factors (EF) based on inventory point and non point engine emissions in Greater San Juan Basin 2014 EI spreadsheet [WESTAR, 2017].

2 In a few instances in the southern SJB, the two van staff members could smell hydrogen sulfide (H2S, extremely hazardous gas) from public locations and downwind of gas-fired engines at compressor stations or well pads. The personal protection H2S alarms (borrowed from the local BLM office) they wore did not go off but the exposure resulted for both in fatigue symptoms for several hours. This anecdote is shared to make other scientists aware of potential exposure risks in O&G fieldwork and to encourage them to get trained and use caution and safety and protection equipment.

Table S7: CH4 and C2H6 plume interval analysis results forflight data within the same hour

| Portion of Basin | Northern SJB | | Southern SJB | |
| --- | --- | --- | --- | --- |
| Range of TIE results | CH4 TIE  with R2>0.5 | C2H6 TIE  with R2>0.5 | CH4 TIE  with R2>0.5 | C2H6 TIE  with R2>0.5 |
| Hourly Minimum | 42% | 34% | 62% | 63% |
| Hourly Maximum | 83% | 86% | 87% | 90% |

Figure S1: Annual natural gas and CBM (A) and oil (B) production volumes for Colorado, New Mexico and the northern and southern San Juan Basin portions between 2000 and 2015.

**B**

**A**

Figure S2: Monthly mean hourly surface horizontal wind speed at seven monitoring stations in the San Juan Basin. 2015 data retrieved from EPA AQS. Site information is in Table 2 of main manuscript.

Figure S3: April 2015 distribution of mean hourly surface horizontal wind “originating” direction at seven monitoring stations in the San Juan Basin. Low to high frequencies of occurence are shown in light to dark gray colors. Colored boxes (blue for nighttime and orange for daytime) highlight strong diurnal features in surface wind direction for six sites.

Figure S4: NOAA wind profiler hourly retrieval of boundary layer height over the NLS (A) and FMT (B) for the period April 9 to May 1, 2015. Colored lines correspond to four days in April 2015 with aircraft data used in this paper’s basin analysis (Section 4.3).

Figure S5: Locations of discrete air samples collected mostly in CH4 plumes emanating from the Fruitland coal outcrop in La Plata County, CO, on three days in April 2015.


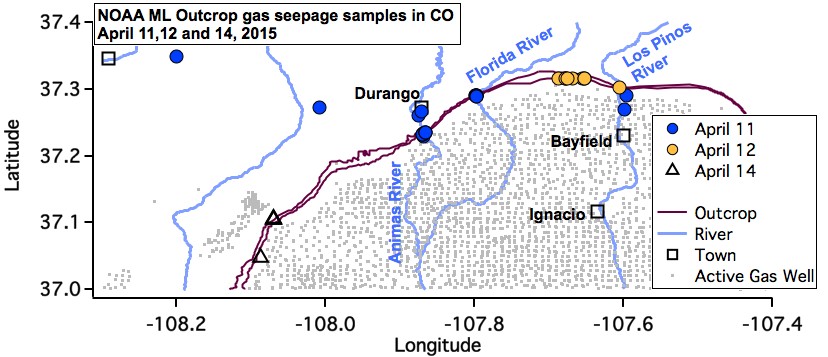


Figure S6: Time series of in-situ CH4 (red trace) and CO2 (green trace) CRDS measurements on April 11, 2015. CH4 results for discrete air samples collected that day are shown in red circles.


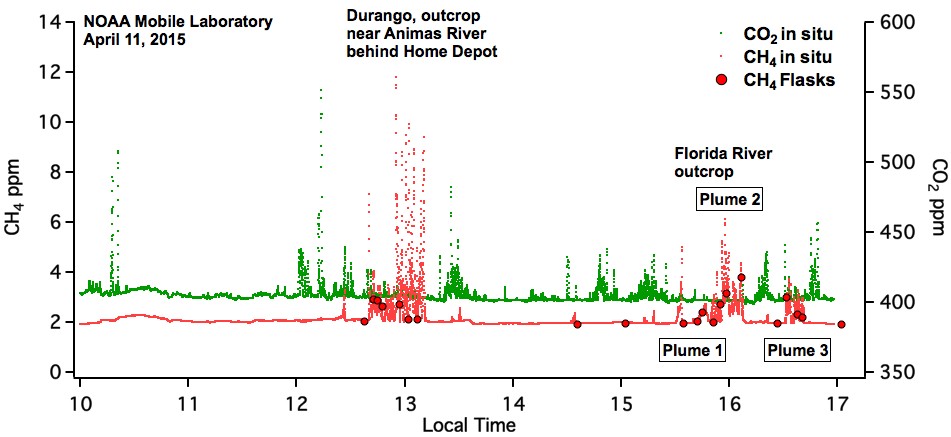


Figure S7: Time series of in-situ CH4 (red trace) and CO2 (green trace) CRDS measurements on April 12, 2015. CH4 results for discrete air samples collected that day are shown in red circles.


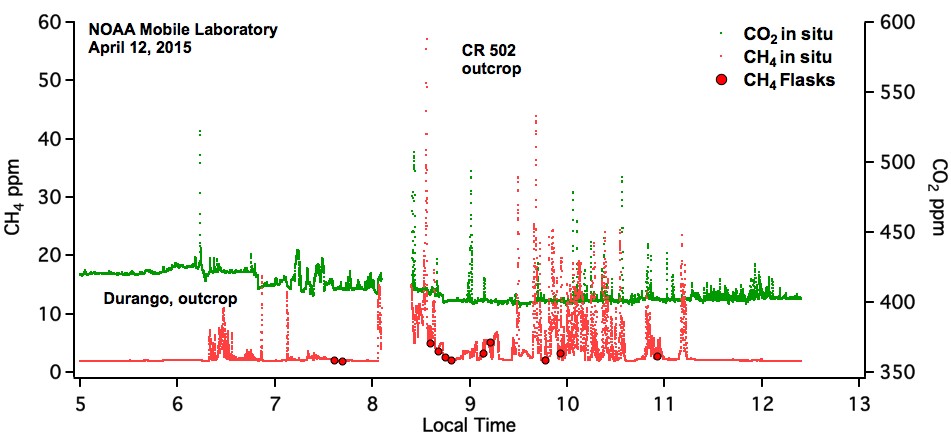


Figure S8: C2H6-to-CH4 (A) and C3H8-to-C2H6 (B) correlation plots for air samples collected on April 11, 12 and 14, 2015 in La Plata County, CO.

Figure S9: Time series of in-situ CH4 (red trace) and CO2 (green trace) CRDS measurements on April 19, 2015. CH4 results for discrete air samples collected that day are shown in red circles.


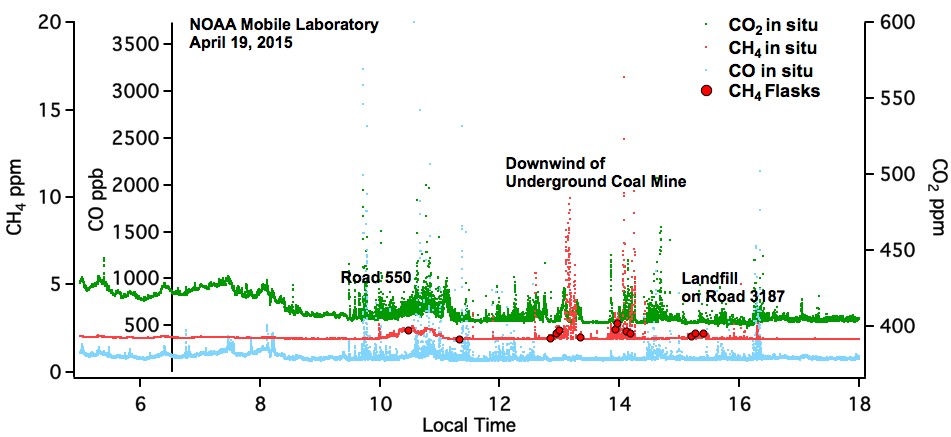


Figure S10: C2H6-to-CH4 correlation plots for air samples collected on April 19, 2015. Samples collected downwind of the San Juan underground coal mine are shown in red circles.


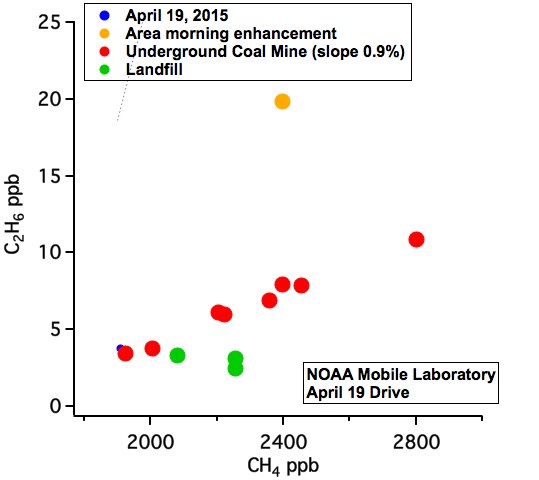


Figure S11: Time series of in-situ CH4 (red trace) and CO2 (green trace) CRDS measurements on April 21, 2015. CH4 results for discrete air samples collected that day are shown in red circles.


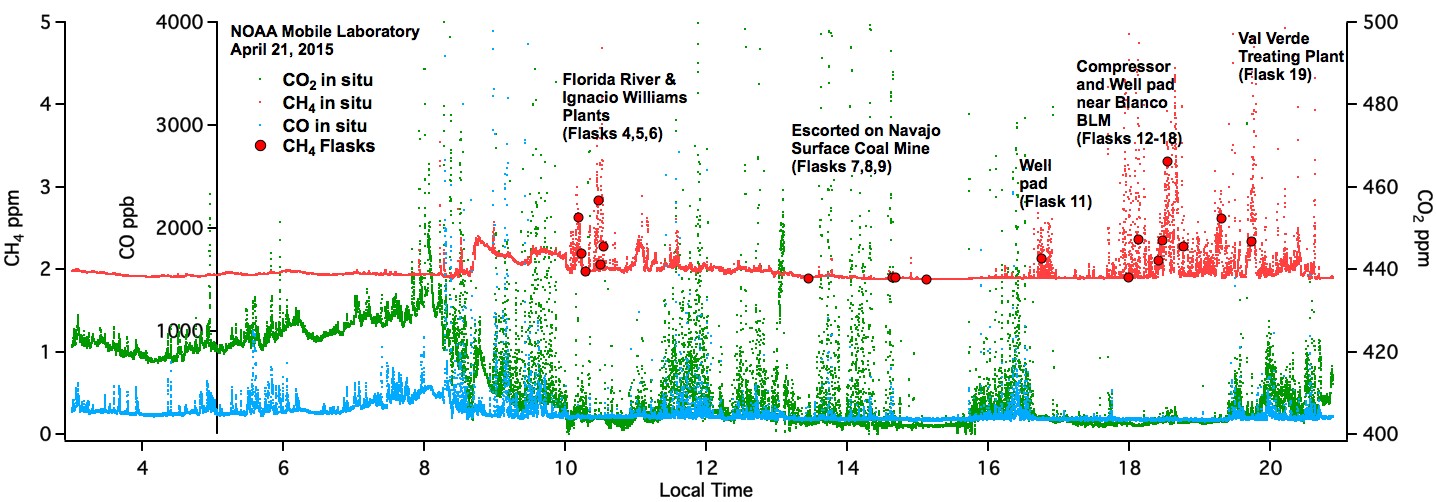


Figure S12: C2H6-to-CH4 correlation plots for air samples collected on April 21, 2015. Samples collected while driving on the Navajo surface coal mine with a Navajo EPA escort are at background levels for CH4 and C2H6 and are shown in red enlarged circles to improve visibility. Information for other samples collected on that day is in the plot caption.


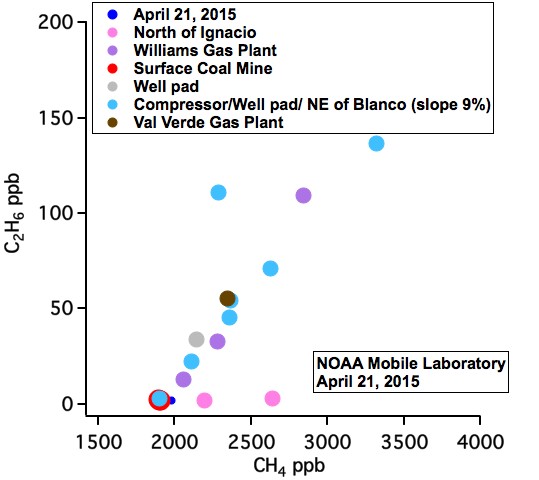


Figure S13: Example of surface CH4 build-up overnight in the San Juan Basin as shown by repeated N-S transects between Durango, CO and Aztec, NM on a low wind night in April 2015.


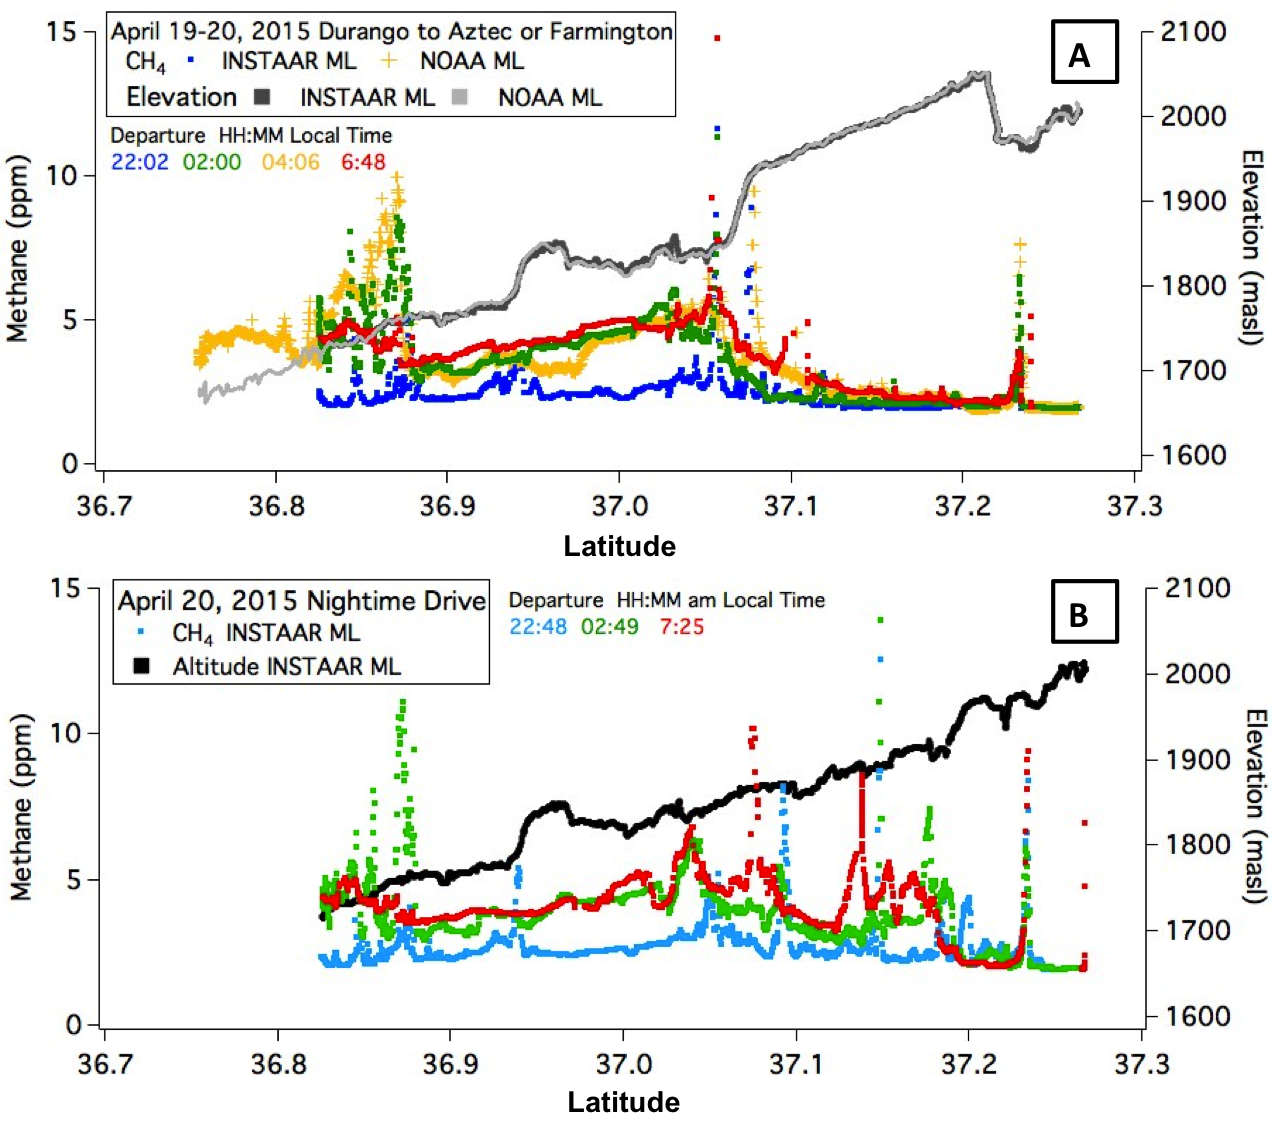


Figure S14: A) Surface elevation color-coded by measured CH4 dry air mole fraction for an early morning loop drive with the NOAA instrumented van in the SJB on April 20, 2015 (see also map in Figure S15A). Some low-lying areas with active O&G operations or outcrop degassing show strongly enhanced CH4 (note some measurements are > 5ppm).

B) Time series of surface CH4 color-coded with latitude (North to South shown as purple to red colors, see scale in Figure S15A). The times when discrete air samples were collected are shown with the black open symbols on both plots (results are shown in Figure S15B-F).

Figure S15: A) Map showing the April 20, 2015 early morning drive track with the NOAA ML (thick black line) and flask sampling locations (colored symbols). B) Correlation plots for CH4 and several NMHC analyzed in the flasks color-coded by latitude.

Figure S16: SA Mooney flight track color-coded by CH4 (left column) and C2H6 (middle column) mixing ratios for 5 survey flight days. Right column has correlation plots for the in-situ CH4 and C2H6 from each flight with symbols color-coded by latitude.

Figure S17: Same as Figure S16, for the NOAA P3 flights.

Figure S18: SA Mooney in-situ CH4 (A) and C2H6 (B) (1-minute average and standard deviation) versus NOAA GMD analysis results for discrete air samples collected on April 13 and April 29, 2015.

Figure S19: Aircraft latitude and in-situ CH4 (black) and C2H6 (green) time series (A) and plume interval C2H6-to-CH4 correlation analysis results (B) for the April 19, 2015 SA Mooney SJB survey flight.

A.


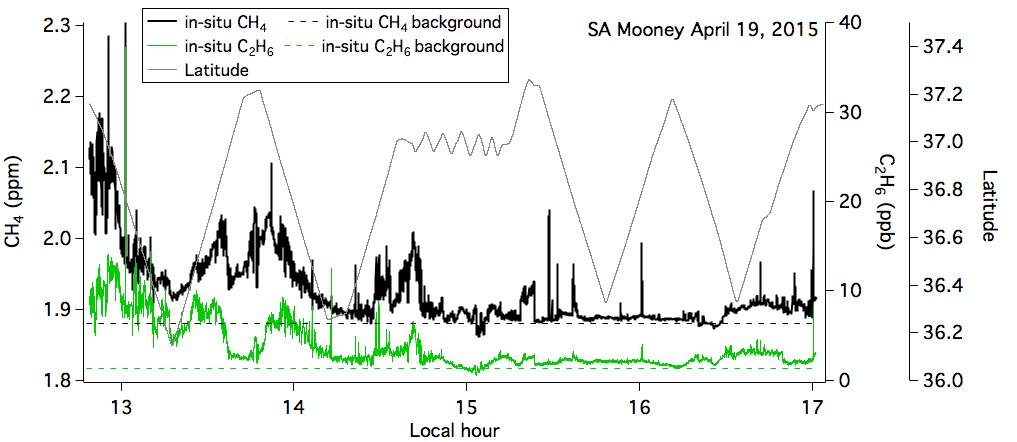


B.


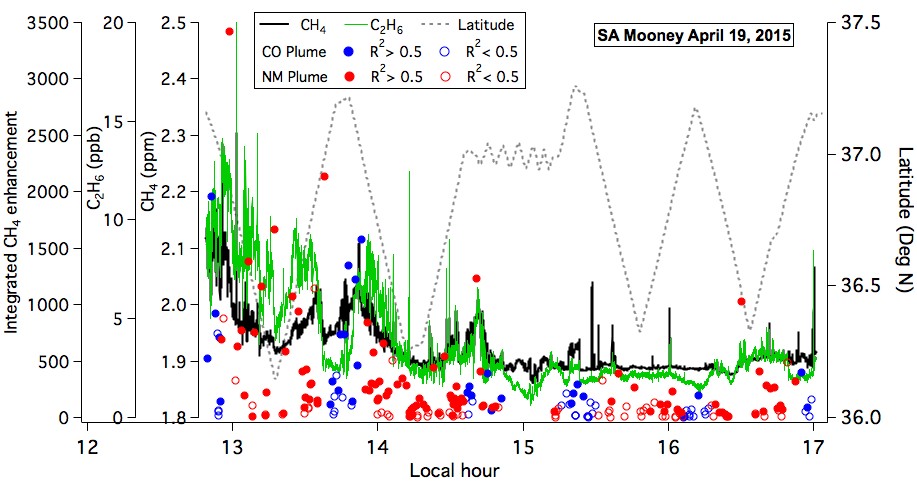


Figure S20: Compilation of SA Mooney 5 survey flight CH4 enhancement intervals with correlated C2H6 (R2>0.5, circles colored by correlation slope) and enhancement intervals with R2 < 0.5 (open circles). Circles are sized by the interval integrated CH4 enhancement (iCH4). Black lines show county and state boundaries. The Fruitland coal formation surface outcrop is shown in light purple color.


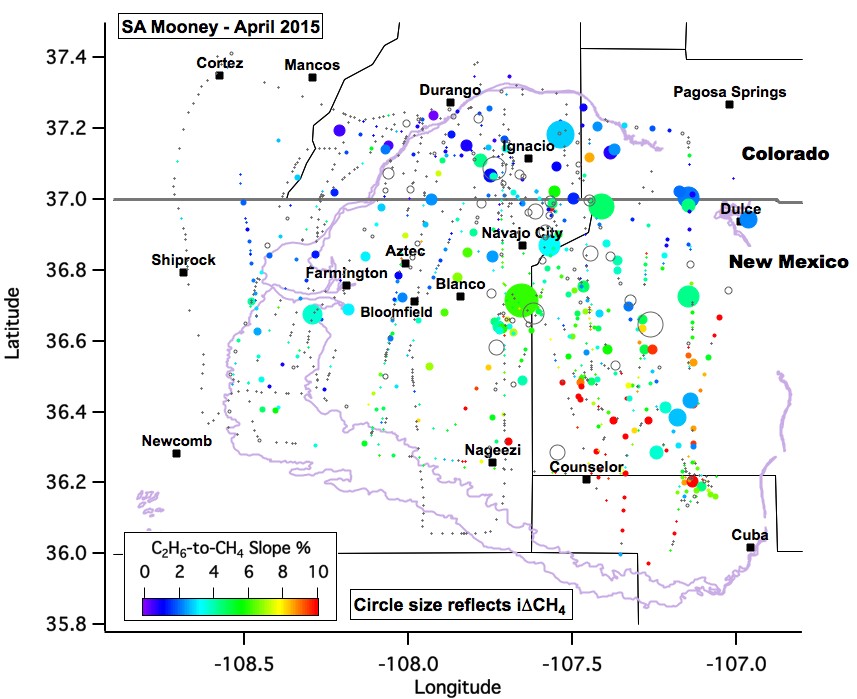


Figure S21: Same as Figure S20 with circles sized by the interval integrated C2H6 enhancement (iC2H6).


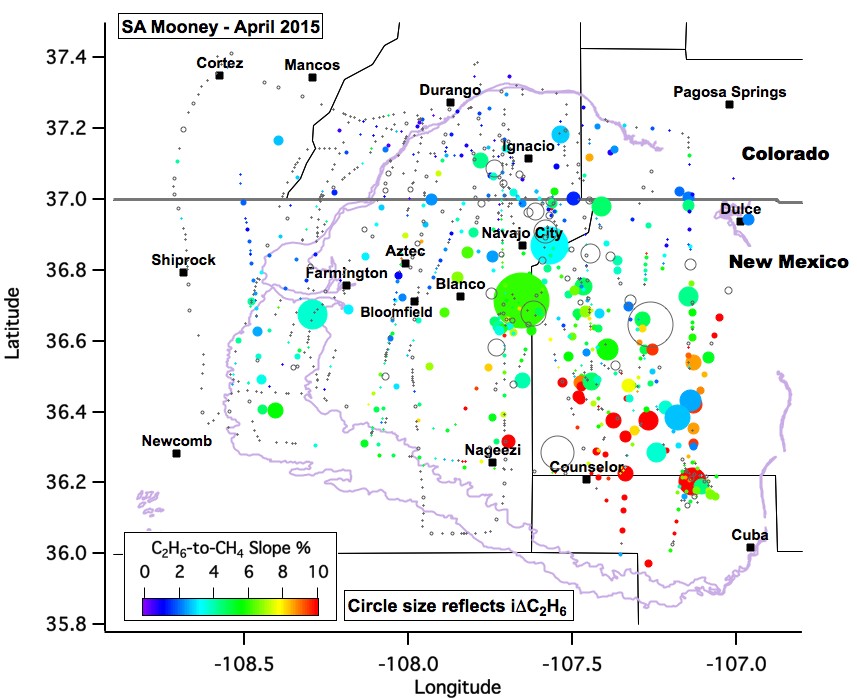


Figure S22: Latitudinal distribution of 5 SA Mooney flights detected CH4 integrated enhancements (total shown in red; with correlation with C2H6 (R2> 0.5) shown in black). Also shown are boundary layer in situ CH4 from two NOAA Twin Otter mass balance flight downwind N-S transects on the eastern border of the San Juan Basin [Smith et al., 2017].


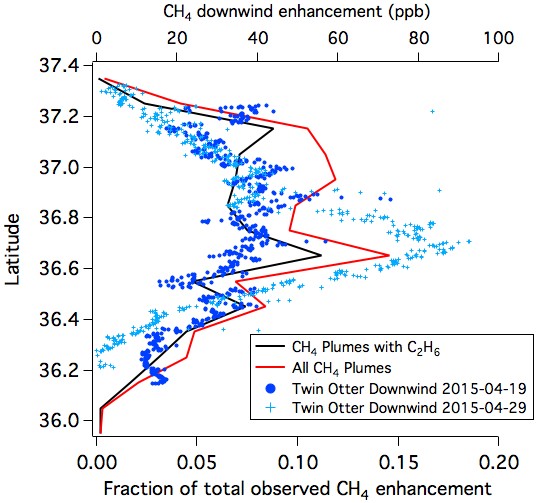


**Figure S23:** Illustration of how air circulation’s typical diurnal pattern and local emissions impact air composition at the surface in the San Juan Basin.

**Supplementary Text**

1. **Background information on CH4 sources in the San Juan Basin**

**1.1. O&G activity and production statistics**

O&G drilling in the US is mostly driven by economics (commodity prices and production costs), technical advances and for older producing regions like the SJB by allowing denser infill well drilling [Parihar et al, 2016; US Forest Service and BLM, 2006; Cullicot et al., 2002]. O&G production from older wells or low-pressure reservoirs in the SJB relies extensively on artificial lift [Parikh et al., 2017]. Annual production statistics for the SJB between 2000 and 2015 are provided in Figure S1.

In April 2015, the northern San Juan Basin (Colorado) produced 23.5 Bcf of CBM, 4 Bcf of conventional (non CBM) natural gas, and 2.6 million barrels of oil [COGCC, 2015] while the southern San Juan Basin produced 21.2 Bcf of CBM, 36 Bcf of natural gas and 713 million barrels of oil [NM OCD 2015]. At peak gas production in the early 2000s, the SJB produced 1 Tcf of CBM and 0.6 Tcf of natural gas annually.

Since the mid 2000s, the rise in US dry shale gas plays has driven O&G national production to record highs and led to lower prices. Conventional O&G and CBM drilling activity and production have been on the decline in the SJB as a result. This past decade, a few operators have been exploring the Mancos Shale formation and the Gallup sandstone for oil using horizontal drilling and hydraulic fracturing. Since 2015, some of the largest O&G operators in the basin have sold their assets.

**1.2. O&G activity data sources**

In the US, States permit O&G well drilling on private and State lands and gather monthly oil, gas and water production volumes from active wells. The US Bureau of Land Management issues drilling permits for leases on Federal and Indian lands. Well-level production statistics are recorded to calculate royalties paid to mineral right owners or the Federal Government. Extraction, transport and treatment of O&G in producing basins rely on a network of pipelines, compressor stations and processing plants, produced water and other waste disposal facilities.

Facility type and location data are critical to support fieldwork planning and execution. From our experience conducting field work in different US O&G basins, comprehensive activity and location data for O&G facilities, besides active wells, are more difficult to compile. In 2015 we gathered information for large CH4 and VOC point source facilities from multiple datasets and agencies: EPA GHGRP, EPA region 8, CO and NM agencies (Colorado Department of Public Health and the Environment and New Mexico Environment Department) and the Southern Ute Indian Tribe. Table S3 summarizes the number of accounted for facilities by type in different datasets.

The midstream facility list in Marchese et al. [2015] (noted M2015 in Table S3) has only one gathering compressor station in the northern SJB while it has the largest number for the southern SJB. M2015 collected activity data from State O&G divisions and some industry partners and it likely did not include facilities on Tribal land in Colorado. Based on our team’s experience, we have found that State O&G commissions and environmental agencies do not always have up-to-date lists and accurate location information for all operating O&G facilities, especially midstream facilities.

**1.3. GHGRP reported O&G CH4 emissions**

For 2015, 16 O&G producing companies reported area source GHG annual emission estimates for upstream operations in the SJB (Table S4). These estimates added up to 21.4 tonnes CH4/hr. Intermittent pneumatic devices at well pads alone contributed 11.3 tonnes CH4/hr [US EPA GHGRP, 2017]. Total emission estimates for high and low-bleed pneumatic devices were much lower 0.7 and 0.8 tonnes CH4/hr respectively. We compute a normalized emission for each company by dividing the reported total emission by the company reported well count. The normalized emissions ranged from 0.26 kg CH4/well/hr to 12.33 kg CH4/well/hr and the average for the 16 companies is 8.93 kg CH4/well/hr.

It is important to note that various factors can lead to variability in normalized emissions from one upstream operator to another: well type and age, equipment count by type and varying practices are a few examples. For the 16 reporting operators, the number of pneumatic devices (intermittent pneumatic devices) per well ranges between 0.73 and 6.43 (0 and 4.77). For another example, let us consider the top two emitting companies in the SJB GHGRP for 2015, referred to as company A (reported a total of 4.9 tonnes CH4/hr, ~ 3,500 wells, 4.77 intermittent pneumatic devices/well) and company B (reported a total of 9.7 tonnes CH4/hr, ~ 9,500 wells, 2.08 intermittent pneumatic devices/well) here. For two of the largest source categories, pneumatic devices and well venting for liquid unloading, company A reported emissions of 3.9 and 0.02 tonnes CH4/hr respectively while company B reported 5.1 and 2.1 tonnes CH4/yr. For 2015, company A (B) reported 1 (202) venting unloading events at wells without plunger lift and 9 (824,251) venting unloading events at wells with a plunger lift [EPA GHGRP, 2017]. For 2015, company A (B) reported 1380 (159) venting workovers without hydraulic fracturing and without flaring. These statistics illustrate some of the spread in reported equipment counts, operations and resulting emissions for major source categories between O&G upstream operators.

The EPA GHGRP for O&G industry sources is not a complete inventory of all known GHG emission source categories and their emissions in a basin. It only includes the larger production operators and emitting facilities and it does not capture all potential source types (for ex. casing gas venting, episodic or chronic malfunctions). It is not clear to what degree the accuracy or representativeness of the GHGRP activity data and emission factors have been evaluated or not.

**2. April 2015 measurements**

**2.1 Surface station wind data**

Figure S2 shows monthly mean hourly wind speeds for all twelve months in 2015 at the seven surface sites listed in Table 2. Figure S3 shows the distribution of hourly means for observed surface wind direction at the sites for April 2015 only.

Surface horizontal wind speed and direction at all surface stations exhibit a strong diurnal cycle. The mean horizontal wind speed diurnal amplitude ranges between 2 and 3m/s at all sites. Depending on the site and month, surface winds start slowing down around 7pm or 9pm and reach a minimum between 9pm and 7am to 10am the next day. Nighttime and early morning wind speeds of less than 2.5m/s are observed at Mesa Verde, Shamrock, Ute 1, Ute 3 and Bloomfield, while they are between 3 and 4 m/s at the San Juan Substation and Navajo Lake. Nighttime and early morning surface winds are typically from the N (Bloomfield), NE (Ute 1, Ute 3), NE then E (San Juan Substation), and E (Navajo Lake). Occasionally, winds at the surface at all three southern SJB sites are westerly at night (April 2-3 and 14-15, 2015).

In 2015, April and May had the strongest midday and afternoon (noon to 4pm or 5pm) monthly mean surface wind speeds, peaking above 5 m/s at Navajo Lake, 6 m/s at the San Juan substation and between 4 and 5 m/s at all other sites. Between 10am and 6pm, horizontal surface winds are predominantly from the SW or W for all five sites within the interior of the SJB.

**2.2 Boundary layer height**

Figure S4 shows the retrieved convective boundary layer height derived from the NOAA 915 MHz wind profiler radar hourly data over NLS and FMT [Bianco et al., 2008]. Different days are shown with different black lines and four days with aircraft flight data used for the CH4 hotspot attribution (main manuscript section 4.2) are shown in colored lines. The boundary layer growth rate and midday peak height show large day-to-day variability.

**2.3 Fruitland coal outcrop gas seepage composition**

Bottom-up CH4 emission flux estimates from seepage along the Fruitland outcrop formations in La Plata county have been derived based on distributed springtime flux chamber measurements [LTE, 2017]. Members of the LTE team met with us in April 2015 to share knowledge about known locations with active seepage and public road access [COGCC/LTE, 2018].

On April 11 and 12, 2015, the NOAA ML collected discrete air samples in CH4 seepage plumes from the Fruitland coal outcrop and in the local “background” air in La Plata County, Colorado (Figures S5-S7). Three of these locations were near Durango where the Animas River, Florida River, Pine River and South Fork Texas Creek cut through the Fruitland coal outcrop.

The near real-time display of CH4 mixing ratio measurements was critical to be able to position the ML in and out of emission plumes (see ML CH4 and CO2 times series in Figures S6 & S7). CH4 levels measured in outcrop gas plumes reached 12 ppm in the early afternoon on April 11, 2015 (37.23oN; 107.87oW)) along the Animas River in Durango, and > 70 ppm on April 12, 2015 morning along CR 502 in a small sheltered valley along the South Fork Texas Creek (37.315oN; 107.652 oW).

On April 14, 2015 late morning the CU INSTAAR ML collected three samples with elevated CH4 along the outcrop on Indian land with a SUIT escort and guide (near 37.105oN; -108.070oW) and one nearby in background air.

Figure S8A shows a correlation plot of C2H6 to CH4 for the April 11, April 12 and April 14 air samples collected in areas with reported Fruitland coal outcrop seepage. For all samples from locations other than the outcrop crossing near the Animas River in Durango, there were no C2H6 enhancements while CH4 enhancements above the local background sample ranged between ~ 500 ppb and 3200 ppb.

On April 12, 2015, we collected eight air samples during a 90-minute window on road 502 in a valley where the South Fork Texas Creek flows. The flask data show C2H6 to CH4 correlation slopes ranging between 0.02% and 0.04% ppb/ppb (R2=0.87) and suggest seepage of very dry gas.

Figure S8B shows a C3H8-to-C2H6 correlation plot for the same air samples as in Figure S8A. All 21 samples from April 11, 2015 show very strong correlation between C3H8 and C2H6 with a slope of 0.38±0.02 ppb/ppb (R2=0.97) while samples from April 12 and April 14 show no correlation between the two species.

The April 11, 2015 samples also show strong correlation between i-C4H10 and n-C4H10 (slope 0.41 ppb/ppb and R2= 0.97) and i-C5H12 and n-C5H12 (slope 1.1 ppb/ppb and R2= 0.96). The latter slope is close to the slopes derived from aircraft sample analyses and is similar to what has been reported for other O&G basin atmospheric studies.

C2-C4 alkanes are mostly emitted along the O&G supply and use chain. The strong correlations between the light alkanes gases for the April 11, 2015 samples collected in Durango suggest that the local “background” air is likely influenced by some upwind O&G emissions. All samples collected in outcrop CH4 plumes had benzene (C6H6) levels below 120 ppt, which is a background level.

On April 16, 2015, the NOAA ML drove on road 170 (north of La Plata, NM) and intersected the Fruitland coal outcrop, ~ 1.2 mile (~2 km) south of the border with Colorado and where the La Plata River is closest to 170. The CRDS instrument detected CH4 levels up to 2500 ppb. Two samples collected in this plume had 300 and 400 ppb CH4 enhancements and 2.27 and 2.28 ppb C2H6 respectively while a background sample collected just north of the plume had 1909 ppb CH4 and 2.17 ppb C2H6. Other measured C3-C6 nonmethane hydrocarbons were enhanced by less than 20 ppt compared to the air in the background sample. There were no obvious CH4 sources in the vicinity. To our knowledge, outcrop degassing in NW NM has not been investigated but it may have been occurring, in the vicinity of this portion of our drive.

**2.4 Coal Mines**

The NOAA ML sampled the exhaust from the San Juan underground coalmine airshaft on April 19, 2015. The ML drove transects along a N-S dirt road ¾ mile east of the airshaft and surface wind were blowing from the west. Downwind CH4 mixing ratios reached over 16 ppm. Eight air samples were collected in the coalmine emission plume between 12:50pm and 14:10pm (Figure S9). C2H6 and CH4 show strong correlation in these samples with a slope of 0.9% and R2 of 0.98 (Figure S10).

On April 21, 2015, the Navajo EPA guided the NOAA ML to sample surface air from dirt roads adjacent to the Navajo surface coal mine operations along Indian Service Road 5082. With surface winds from the west, the ML CRDS measured background level CH4 (1880-1910 ppb) for this entire portion of the drive between 1:30pm and 3:10pm Local Time (Figures S11 & S12). Four flasks collected during that time showed CH4 and C2H6 ranging between 1880-1906 ppb and 1.7-2.7 ppb respectively.

The SA Mooney airplane flew around the San Juan underground coalmine vent shaft, and quantified non-zero emissions three times out of five quantification visits (see [Conley et al., 2017] for the method; and facility emissions estimates are a personal communication). The SA Mooney mean top-down CH4 emission estimate for the coalmine vent shaft for the 5 flights was 1.5±1.5 tonnes/hour. For context, this facility contributed on average ~ 2.4% of the SJB aircraft mass balance mean CH4 emissions reported by Smith et al. [2017] (62 ± 23 tonnes/hour). The San Juan coalmine aircraft-based emission estimate is much less than Maasakkers et al. [2016] estimate for 2012. Note that on an annual basis the coalmine produced 30% more coal in 2015 compared to 2012 [US EIA, 2018a]. We recognize that the mineshaft is a major point source with temporally varying emissions, which make the comparison of a short-term measurement average and an annual inventory estimate potentially flawed.

**2.5 Nighttime surface CH4 build-up**

At night on April 20, 2015, both the INSTAAR and NOAA vans conducted multiple drives between Durango, CO and Aztec, NM. That night was chosen as the weather forecast was for very low surface winds. Surface site meteorological measurements confirm very low mean surface wind speeds that night at all locations: 10pm to 8am LST, 1.2 m/s at UTE 1 to 2.5 m/s at the San Juan Substation.

The INSTAAR van drove on two roads with different elevation profiles. On N to S drives, the INSTAAR and NOAA vans drove along highway 550 from Durango to Aztec (and 516 to Farmington). On South to North drives, the INSTAAR van left Aztec and drove on highway 550 and then took a lower elevation road (213, at most 3.2 km west of 550) at 37.048oN, gradually rising along the Animas river all the way to Durango. Figure S13 shows CH4 in-situ measurements from both vans for all N-S and S-N transects driven that night. The 22:00 LT to 23:00 LT transects start showing some CH4 accumulation at the surface, with baseline levels mostly contained between 2 ppm and 3ppm. Later drives show further buildup with baseline levels between 3ppm and 5ppm south of 37.2oN on road 213 and south of 37.1oN on road 550.

To investigate the chemical composition of the nighttime surface air in the region, the NOAA ML collected air samples every 10-15 minutes along its April 20, 2015 early morning 5-hour loop drive (Figure S14). The air sampling locations for 17 flasks are noted on Figure S15A. Six samples collected in CO north of 37.1oN show much lower NMHC mixing ratios than the samples collected in NM (Figure S15B-F). Six samples collected in NM south of 36.9oN all have CH4 mixing ratios above 3 ppm and substantially elevated and highly correlated NMHC mixing ratios. For these six samples, the C2H6 to CH4 slope is 6.4% (R2=0.98).

**2.6 Flushing of overnight CH4 enriched air out of SJB**

The SJB approximate W-E dimensions are 80km in Colorado and 130 km in New Mexico. Given these and typical diurnal wind patterns in the region (Figure 2), it takes on average 4.4 to 5.6 hours of steady afternoon westerly winds at 4-5m/s in Colorado and 5.2 to 6 hours of steady afternoon westerly winds at 6-7 m/s in New Mexico to flush the CH4-rich air outside of the basin boundaries (see illustration in Figure S23 of the SJB diurnal air circulation pattern).

The aircraft box pattern flight in the well mixed PBL for the regional top-down mass balance technique requires complete flushing of the basin nocturnal and morning CH4 enriched air before conducting the downwind leg. Therefore the aircraft mass balance downwind legs in April 2015 were conducted in mid (3:30pm, mean wind 10 m/s) to late afternoon (5pm, mean wind 5.8 m/s) depending on the SJB PBL afternoon mean wind speeds (Table 1 in [Smith et al., 2017]).

**2.7 Aircraft data analysis**

Figures S16 and S17 show the tracks for 5 SA Mooney flights and two NOAA P-3 flights color-coded by in situ CH4 (left column) or in situ C2H6 (middle column). Correlation slopes between in situ C2H6 and CH4 for each flight are also shown (right column) and symbols are color-coded by the measurement latitude.

Here we show a few figures illustrating how the aircraft the CH4 and C2H6 fast response in-situ measurements are analyzed to detect and attribute emission plume enhancements (see Section 4.3.1 in main manuscript). Figure S19A shows the CH4 and C2H6 measurement time series for the SA Mooney April 19 flight (see also map and correlation plot in Figure S16). iCH4 and interval slope is plotted as a function of each data interval mean flight time and color-coded for the NSJB (blue) and SSJB (red) in Figure S19B. We distinguish intervals with R2 above 0.5 (significant correlation, color-filled circles) and below 0.5 (weak or no correlation, empty circles).

The interval analysis for the survey flights can be further broken down to look at the spatial distribution of enhancements and C2H6 to CH4 slopes. Figures S20 and S21 shows the mean location (latitude, longitude) of the CH4 and C2H6 intervals for the 5 SA Mooney flights. Solid symbols denote intervals with R2>0.5, the symbol color indicates the interval data C2H6-to-CH4 correlation slope (0-10% or above) and the symbol size reflects of the magnitude of the interval integrated enhancement for methane iCH4 (Figure S20) or ethane iC2H6 (Figure S21). Interval locations as expected follow the flight tracks. Most intervals with R2>0.5 and low correlation slope are confined to the northern SJB and the NW portion of the southern SJB. There is a wide cluster of intervals with slopes at or above 8% in the SE corner of the southern SJB (around Counselor) coinciding with a cluster of oil and associated gas wells, a region also studied with the NOAA ML on April 17, 2018.

For the southern SJB, the SA Mooney flight interval with the largest iCH4 was observed just south of road 64, 6.7 km south of Navajo City (interval center 36.7162oN—107.6553oW, 37.4km long) on April 9 around 2pm and represented 2.3% of the southern SJB cumulative CH4 TIE with R2> 0.5 for the five SA Mooney flights. The plume had a slope of 6.1% (R2=0.94). For the northern SJB, the Mooney flight interval with the largest integrated enhancement was observed SE of Bayfield (37.1846oN—107.5375W, 52km long) on April 30 around 10:07am and represented 5.3% of the northern SJB cumulative CH4 TIE for the five SA Mooney flights. That interval had a C2H6-to-CH4 slope of 2.8% (R2=0.60).

There were several other large CH4 point sources in the SJB. Frankenberg et al. [2016] identified 250 CH4 point source emission plumes imaged from 5 NASA AVIRIS-NG flights over portions of the basin in April 2015. They derived facility scale CH4 emission estimates using a simple scaling of integrated CH4 excess plumes evaluated against three SA Mooney aircraft facility level emission estimates. They reported an estimated 26.3-44.5 tonnes/hour (2) emitted by those 250 facilities and found that the top 10% emitters in the AVIRIS-NG surveyed area contributed half or more of their emission total. The 250 facility identities and locations were not made available in [Frankenberg et al., 2016].

**2.8 CH4 and C2H6 aircraft and discrete sample measurement comparison**

Figure S18 shows a comparison of SA Mooney 1-minute average measurement versus the NOAA GMD flask analysis: CH4 (CRDS vs GC-FID) and C2H6 (TILDAS vs GC-MS).

**2.9 Latitudinal distribution of CH4 hotspot and mass-balance downwind CH4 plume**

Figure S22 shows the latitudinal distribution of detected CH4 enhancements detected over the SJB by the SA Mooney on 5 flights. The red line shows the distribution for all CH4 enhancements and the black line shows only CH4 enhancements with R2 > 0.5. Also shown are the latitudinal distributions of the basin downwind CH4 plume for two NOAA Twin Otter mass balance flights (blue symbols).

**References**

Bianco, L, Wilczak, JM, White, AB. 2008. Convective Boundary Layer Depth Estimation from Wind Profilers: Statistical Comparison between an Automated Algorithm and Expert Estimations. *Journal of Atmospheric and Oceanic Technology* (25) pp. 1397-1413. DOI: 10.1175/2008JTECHA981.1.

Colorado Oil and Gas Conservation Commission (COGCC). 2015. Monthly production statistics. Available at: http://cogcc.state.co.us/data.html#/cogis.

COGCC/LTE. 2018. San Juan Basin Outcrop Monitoring Reports. Available at http://cogcc.state.co.us/documents/library/AreaReports/SanJuanBasin.

Conley, SA, et al.. 2017. Application of Gauss's theorem to quantify localized surface emissions from airborne measurements of wind and trace gases. *Atmos. Meas. Tech.*, 10, 3345-3358. DOI:10.5194/amt-10-3345-2017.

Cullicott, C, Dunmire, C, Brown, J, and Calwell, C. 2002. Coalbed Methane in the San Juan Basin of Colorado and New Mexico. Coalbed Methane Development in the Intermountain West (April 4-5, 2002). Conference Proceeding available at http://scholar.law.colorado.edu/coalbed-methane-development-intermountain-west/3.

Grant J. et al., 2016. San Juan and Permian Basin 2014 Oil and Gas Emission Inventory Inputs, Final Report, prepared for BLM NM office and WESTAR, available at https://www.wrapair2.org/pdf/2016-11y_Final%20GSJB-Permian%20EI%20Inputs%20Report%20(11-09).pdf.

LTE. 2017. Fruitland Formation Outcrop Methane Flux Measurements 2007 –2017 and Converting Fugitive Methane Gas Emissions into a Viable Resource, Ager et al. presentation at the 2017 Four Corners Air Quality Group meeting in Durango, 9-12-2017, available at https://www.env.nm.gov/air-quality/fcaqg/, under Meetings.

Maasakkers, JD, et al.. 2016. Gridded National Inventory of U.S. Methane Emissions. *Environ. Sci. Technol.*, 50 (23), pp 13123–13133. DOI: 10.1021/acs.est.6b02878.

Marchese, AJ et al.. 2015. Methane Emissions from United States Natural Gas Gathering and Processing, *Environ. Sci. Technol.*, 49 (17), pp. 10718–10727. DOI: 10.1021/acs.est.5b02275

New Mexico Oil Conservation Division (NM OCD). 2015. Well information available at: https://wwwapps.emnrd.state.nm.us/ocd/ocdpermitting/Data/Wells.aspx, 2015.

Parihar P., R. Warner, J. Micikas et al., Infill Drilling Opportunity in Fruitland Coal, San Juan Basin, Colorado, SPE-180247-MS, DOI: 10.2118/180247-MS, 2016.

Smith, ML, et al.. 2017. Airborne Quantification of Methane Emissions over the Four Corners Region. *Environ. Sci. Technol*.  51, (10), pp. 5832-5837. DOI: 10.1021/acs.est.6b06107.

US Energy Information Agency, 2018, Annual Coal Report for previous year and back to 2002, available at https://www.eia.gov/coal/annual/ and links therein.

US Energy Information Agency, 2018. Crude oil and natural gas U.S. and States statistics at https://www.eia.gov/petroleum/data.php and https://www.eia.gov/naturalgas/data.php

US EPA Greenhouse Gas Reporting, 2018, available at https://ghgdata.epa.gov/ghgp/main.do

US Forest Service and Bureau of Land Management, 2006. San Juan Basin National Forest and BLM, Colorado, Oil and gas potential and reasonable foreseeable development (RFD) scenarios in the San Juan National Forest and BLM Public Lands, Colorado Available at https://www.fs.usda.gov/Internet/FSE_DOCUMENTS/stelprd3836889.pdf.
